# Supplementary material for: Scandium, titanium and vanadium complexes supported by PCP-type pincer ligands: synthesis, structure, and styrene polymerization activity
Source: Royal Society of Chemistry journal article supplement (doi:10.1039/d2dt01389d), 2022-01-01
Supplement: d2dt01389d1.pdf [file d2dt01389d1.pdf]

ELECTRONIC SUPPORTING INFORMATION

**Scandium, Titanium and Vanadium Complexes Supported by PCP-type Pincer  
Ligands: Synthesis, Structure, and Styrene Polymerization Activity**

Jiayu Zhang,<sup>†</sup> Wenshuang Huang,<sup>‡</sup> Kailing Han,<sup>b</sup> Guoyong Song,<sup>\*,†</sup> and Shaowei Hu<sup>\*,‡</sup>

<sup>†</sup>Beijing Key Laboratory of Lignocellulosic Chemistry, Beijing Forestry University,  
Beijing 100083, People's Republic of China

<sup>‡</sup>College of Chemistry, Beijing Normal University, No. 19, Xin-wai street, Beijing  
100875, People's Republic of China.

\*To whom correspondence should be addressed. E-mail: [shu@bnu.edu.cn](mailto:shu@bnu.edu.cn),  
[songg@bifu.edu.cn](mailto:songg@bifu.edu.cn).

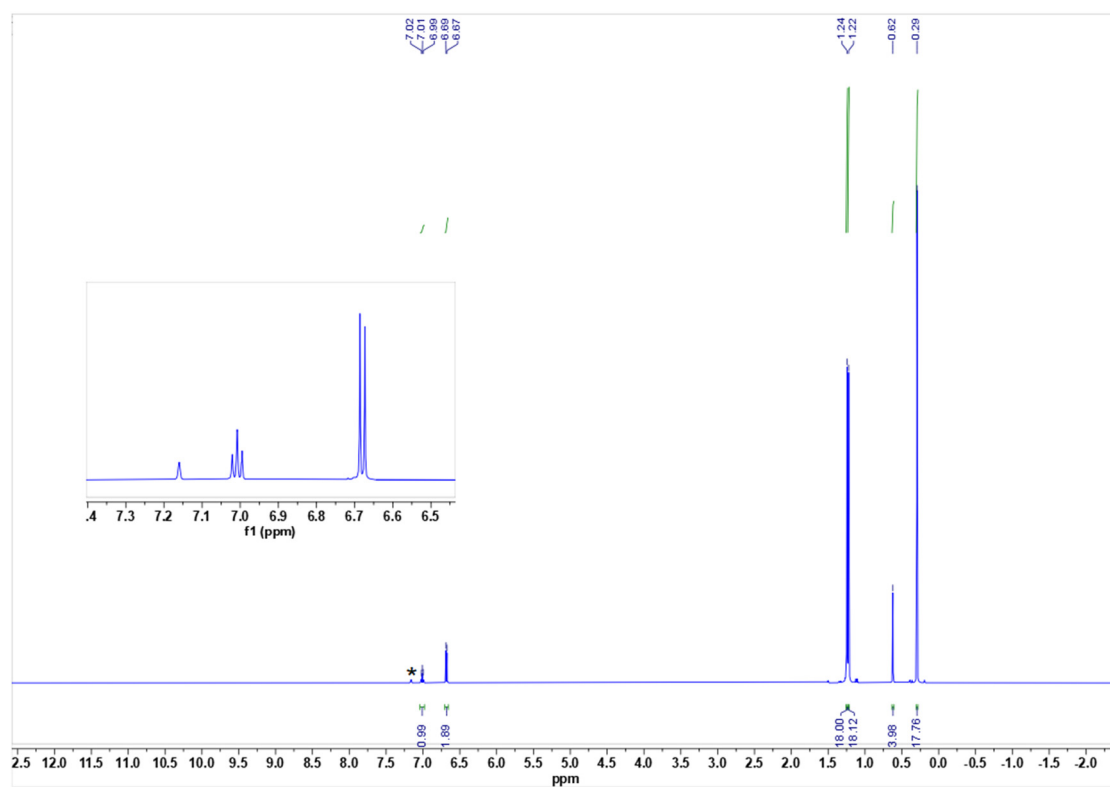

Figure S1.  $^1\text{H}$  NMR spectra of complex **1-Sc** ( $\text{C}_6\text{D}_6$ , rt,  $^*\cdots\text{C}_6\text{D}_6$ )

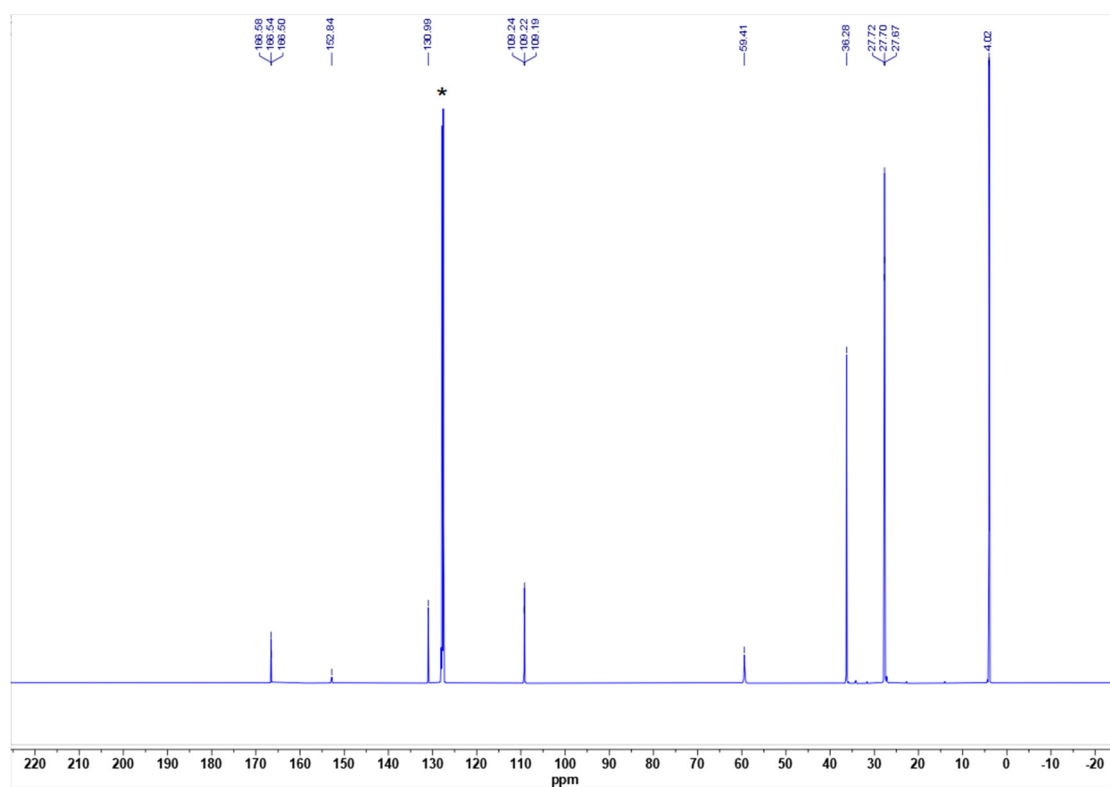

Figure S2.  $^{13}\text{C}$  NMR spectra of complex **1-Sc** ( $\text{C}_6\text{D}_6$ , rt,  $^*\cdots\text{C}_6\text{D}_6$ )

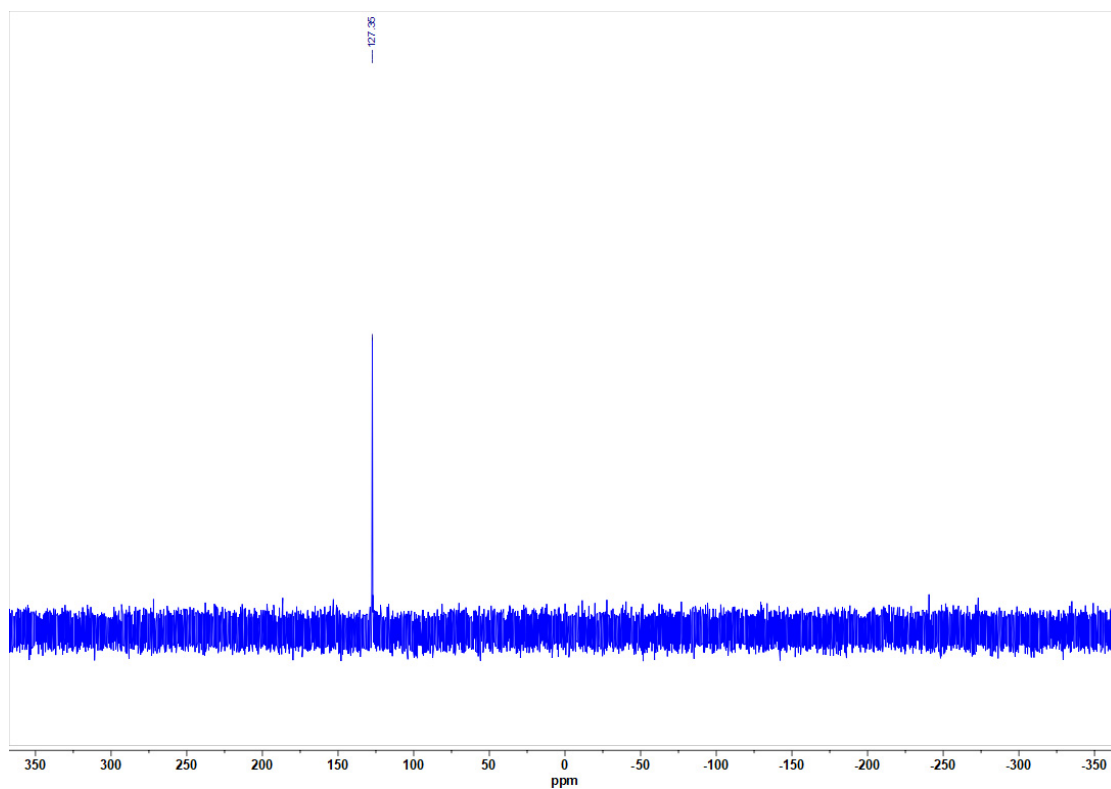

Figure S3.  $^{31}\text{P}$  NMR spectra of complex **1-Sc** ( $\text{C}_6\text{D}_6$ , rt,  $^*\cdots\text{C}_6\text{D}_6$ )

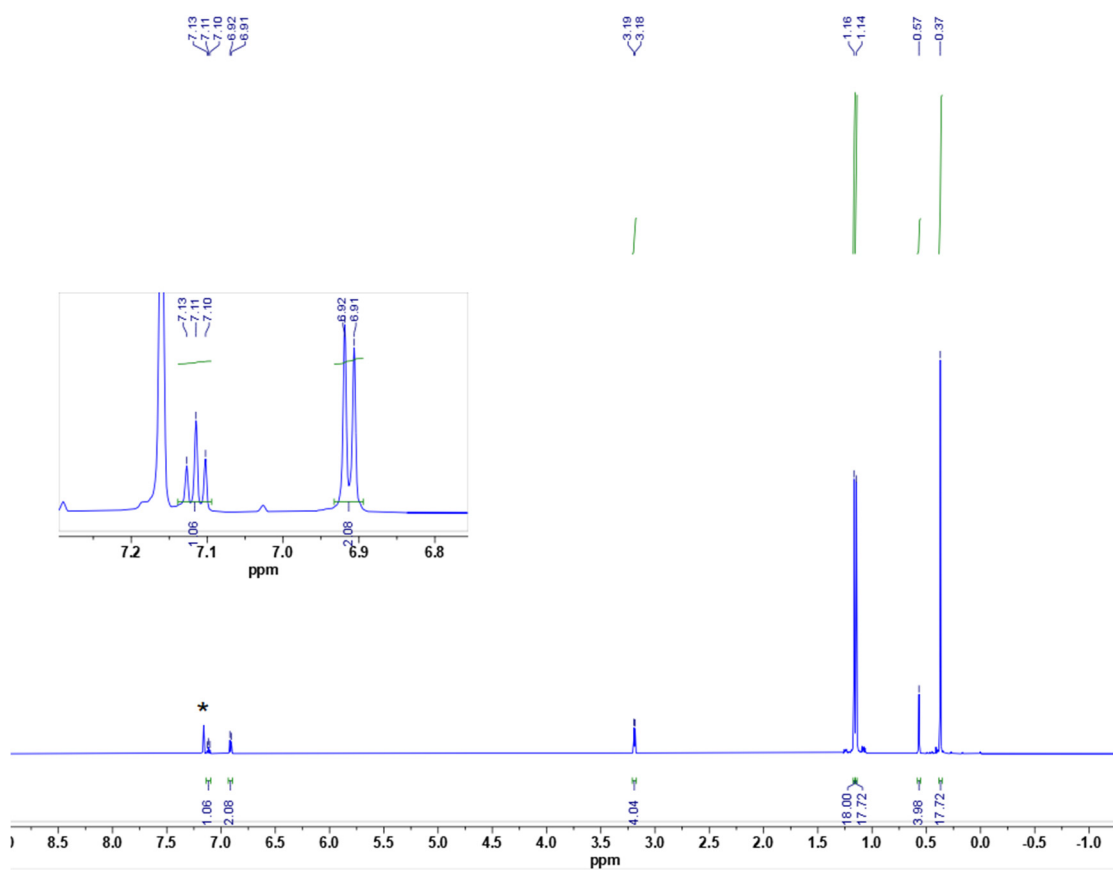

Figure S4.  $^1\text{H}$  NMR spectra of complex **2-Sc** ( $\text{C}_6\text{D}_6$ , rt,  $^*\cdots\text{C}_6\text{D}_6$ )

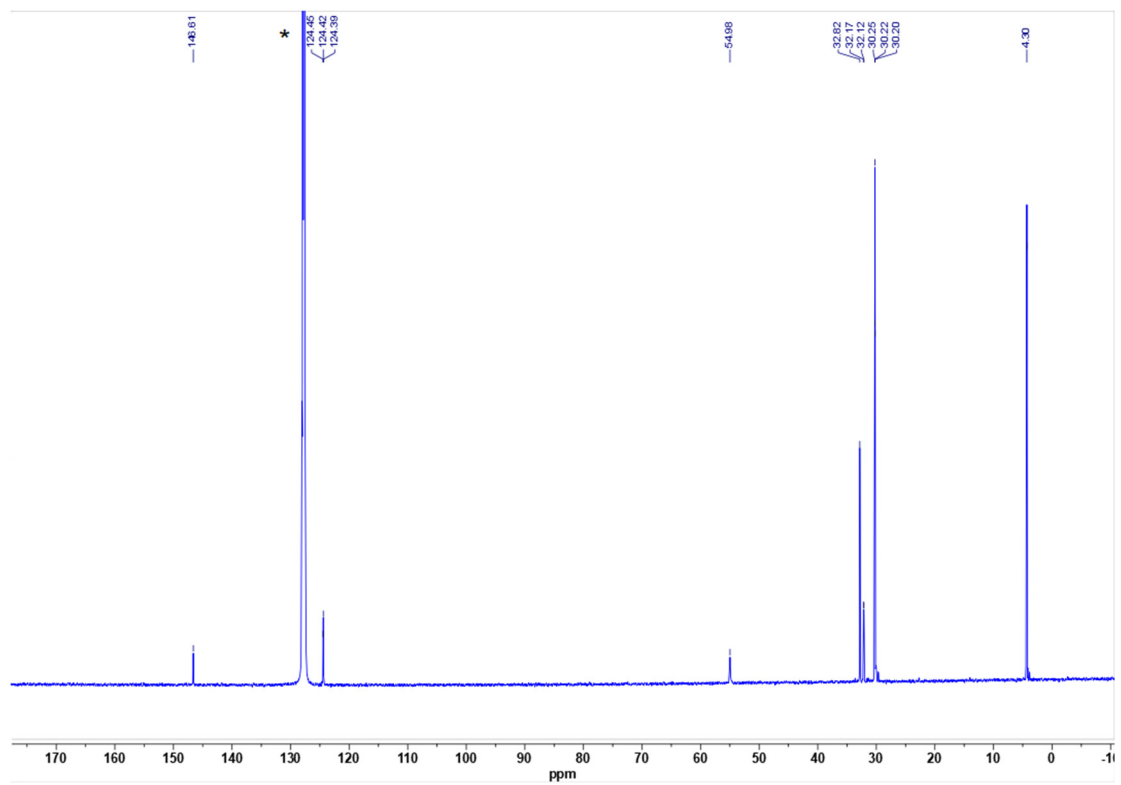

Figure S5.  $^{13}\text{C}$  NMR spectra of complex **2-Sc** ( $\text{C}_6\text{D}_6$ , rt,  $^*\cdots\text{C}_6\text{D}_6$ )

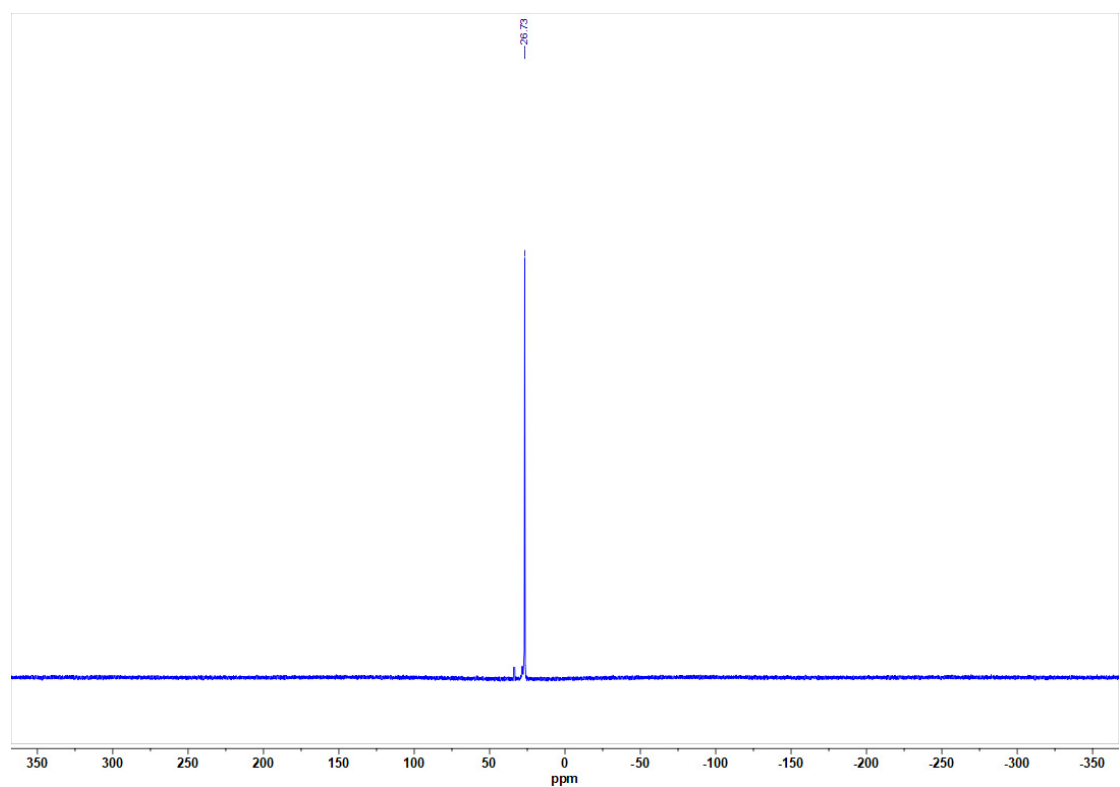

Figure S6.  $^{31}\text{P}$  NMR spectra of complex **2-Sc** ( $\text{C}_6\text{D}_6$ , rt,  $^*\cdots\text{C}_6\text{D}_6$ )

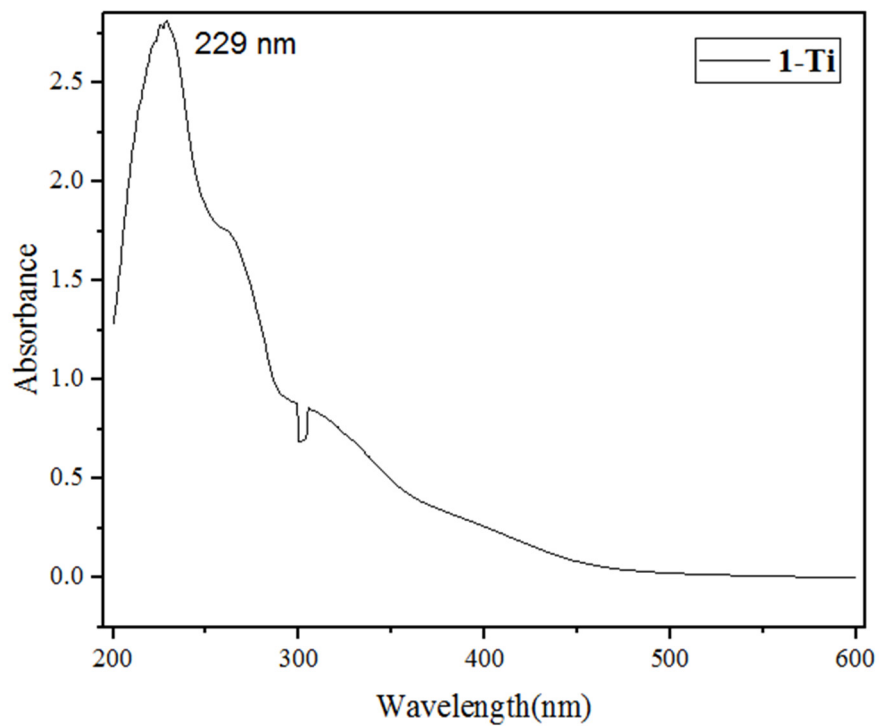

Figure S7. UV-Vis spectra of **1-Ti**

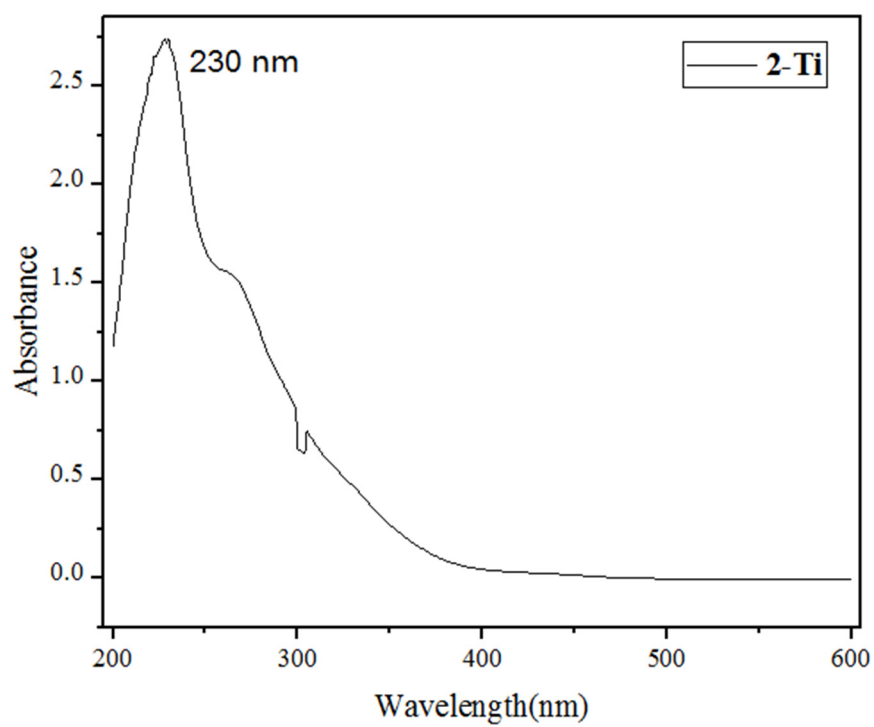

Figure S8. UV-Vis spectra of **2-Ti**

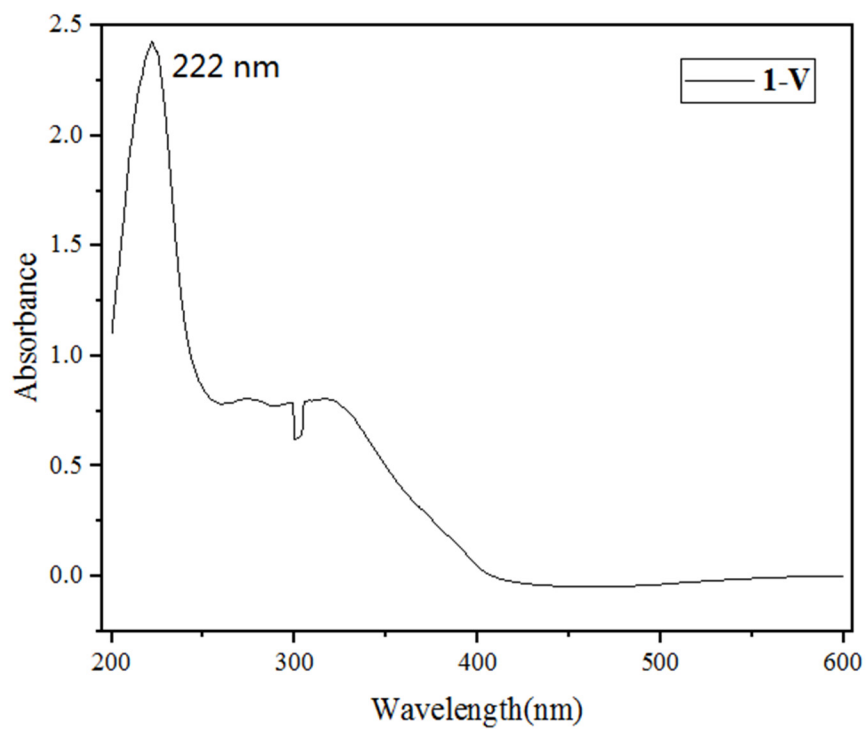

Figure S9. UV-Vis spectra of **1-V**

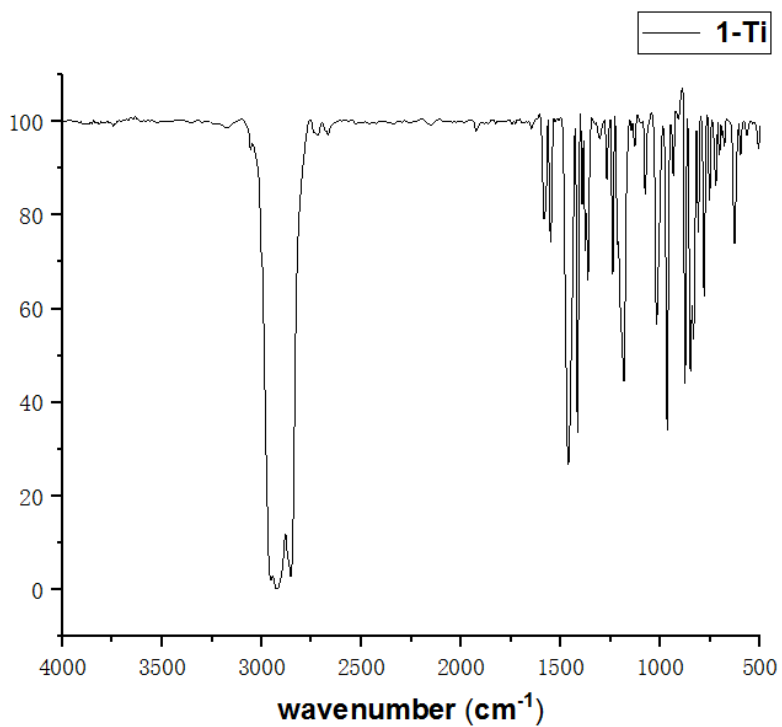

Figure S10. Infrared spectra of **1-Ti**

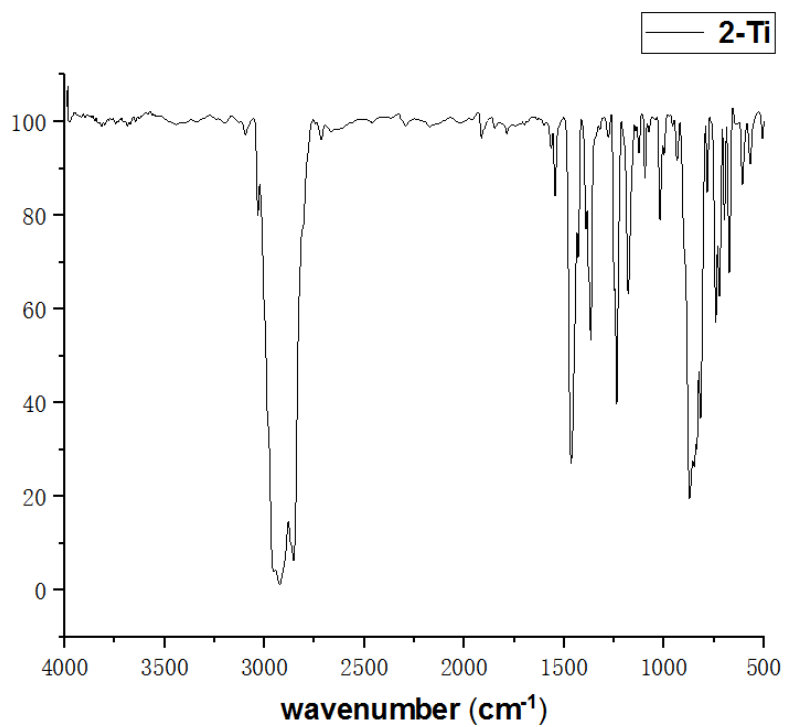

Figure S11. Infrared spectra of 2-Ti

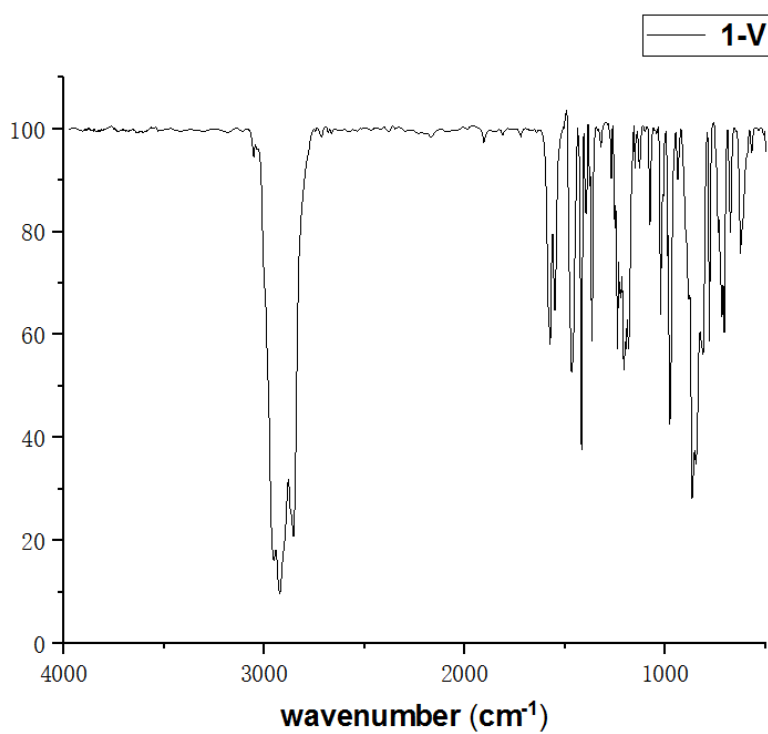

Figure S12. Infrared spectra of 1-V

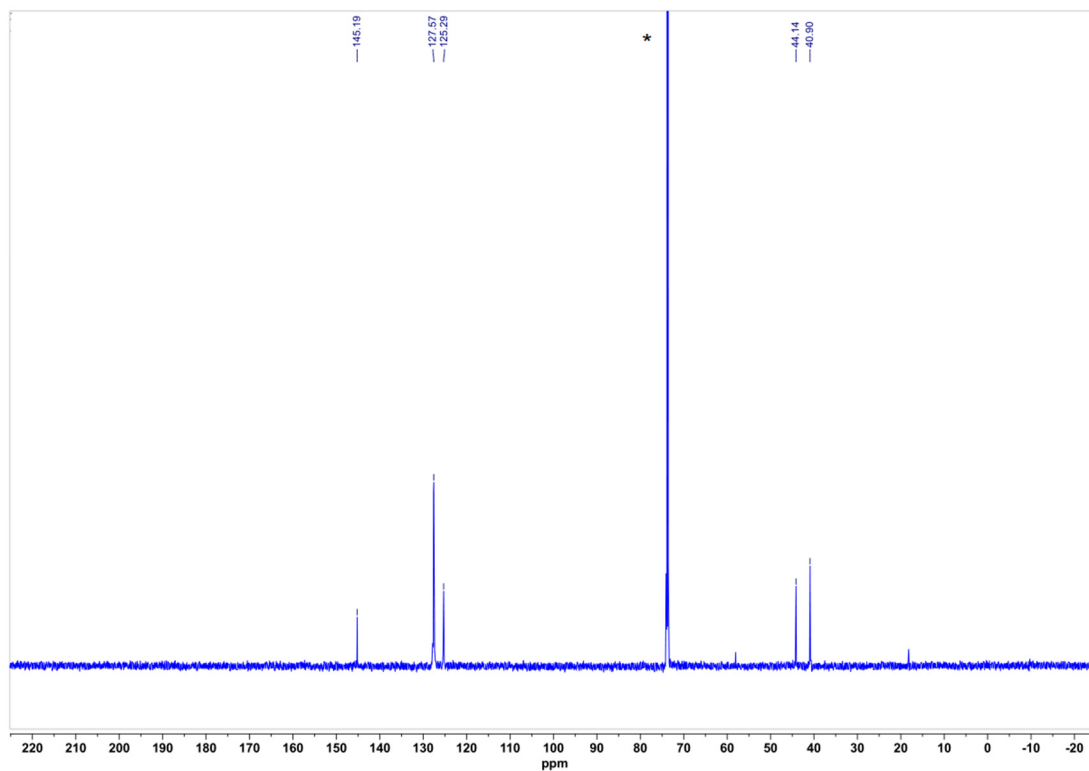

Figure S13.  $^{13}\text{C}$  NMR (120 °C, \*...1,1,2,2-tetrachloroethane- $d_2$ ) of sPS obtained with complex **1-Sc**

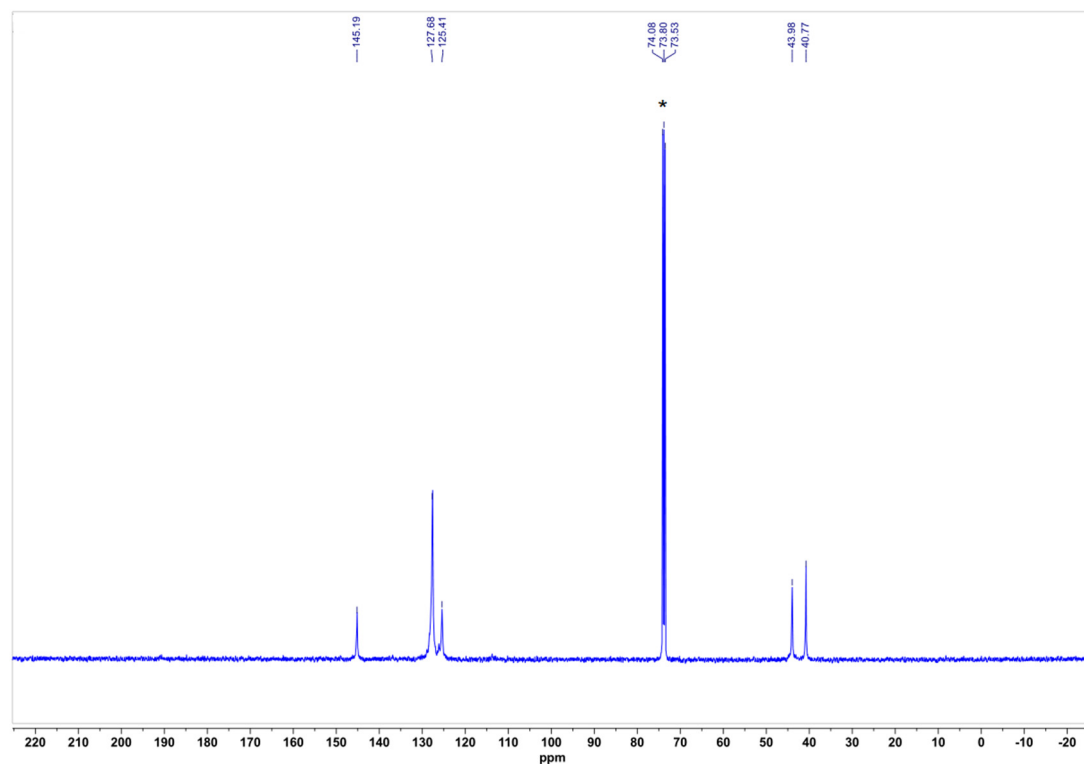

Figure S14.  $^{13}\text{C}$  NMR (120 °C, \*...1,1,2,2-tetrachloroethane- $d_2$ ) of sPS obtained with complex **2-Sc**



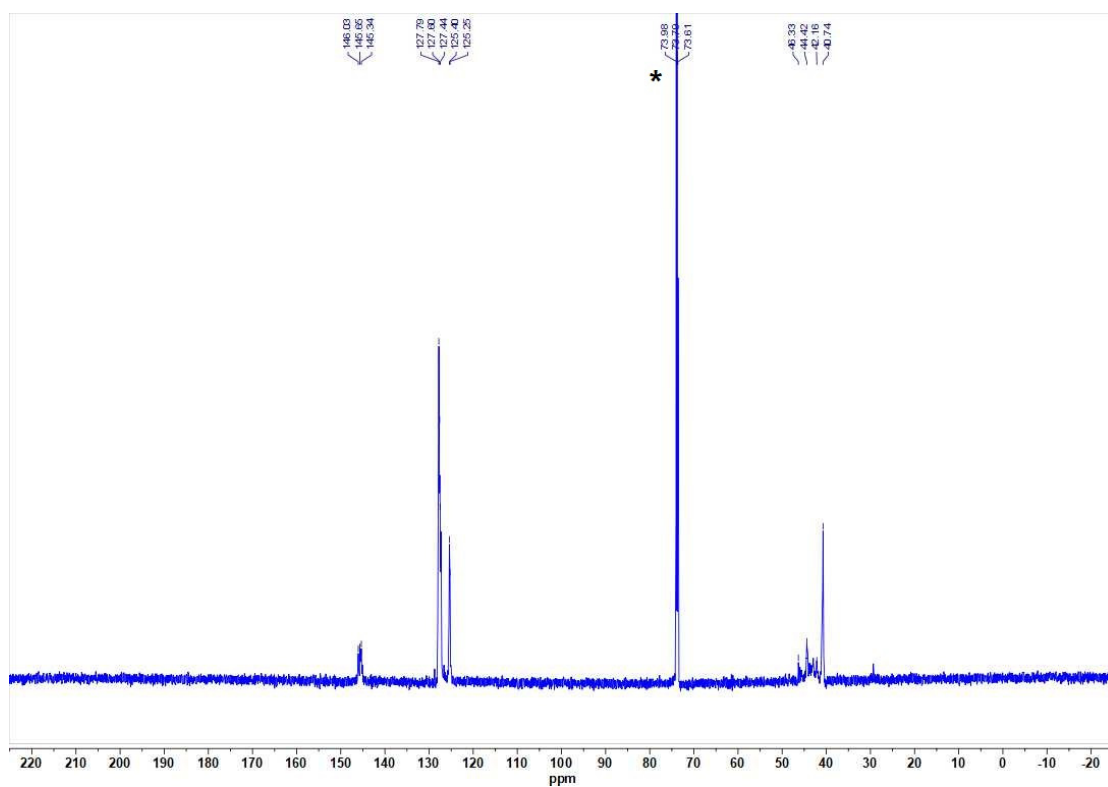

Figure S15.  $^{13}\text{C}$  NMR (120  $^{\circ}\text{C}$ , \*...1,1,2,2-tetrachloroethane- $d_2$ ) of aPS (atactic polystyrene) obtained with complex **1-Ti**

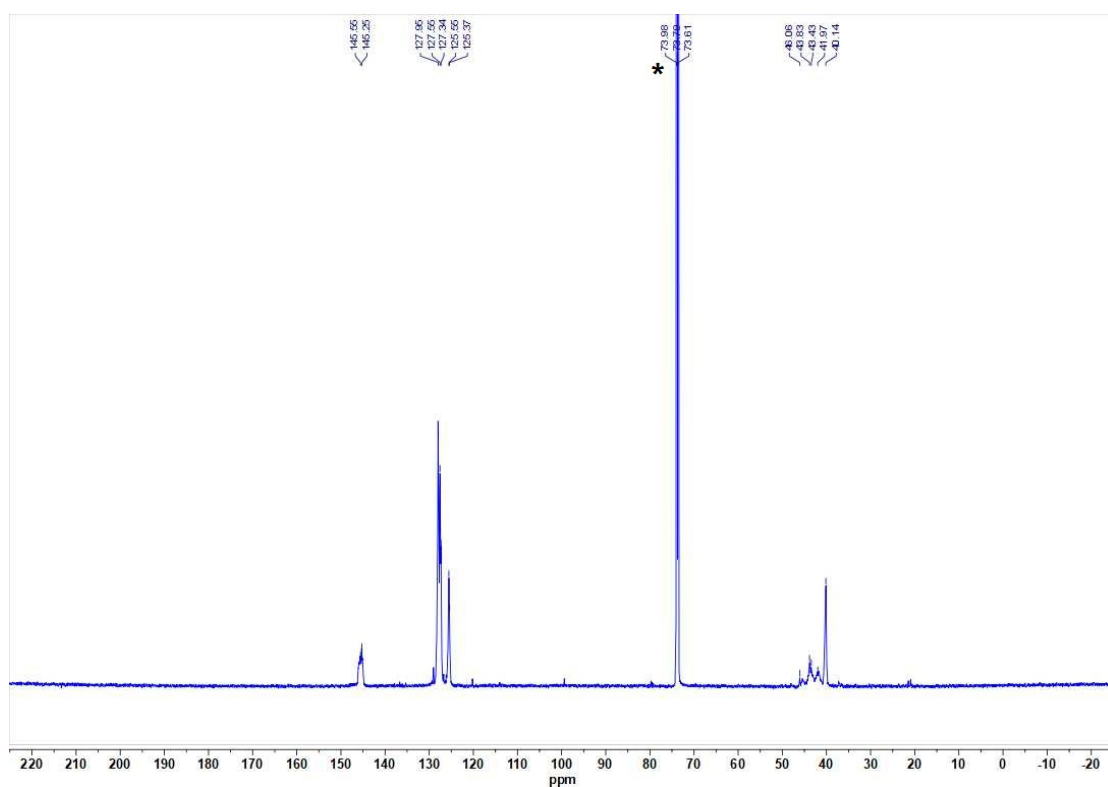

Figure S16.  $^{13}\text{C}$  NMR (120  $^{\circ}\text{C}$ , \*...1,1,2,2-tetrachloroethane- $d_2$ ) of aPS (atactic polystyrene) obtained with complex **1-V**

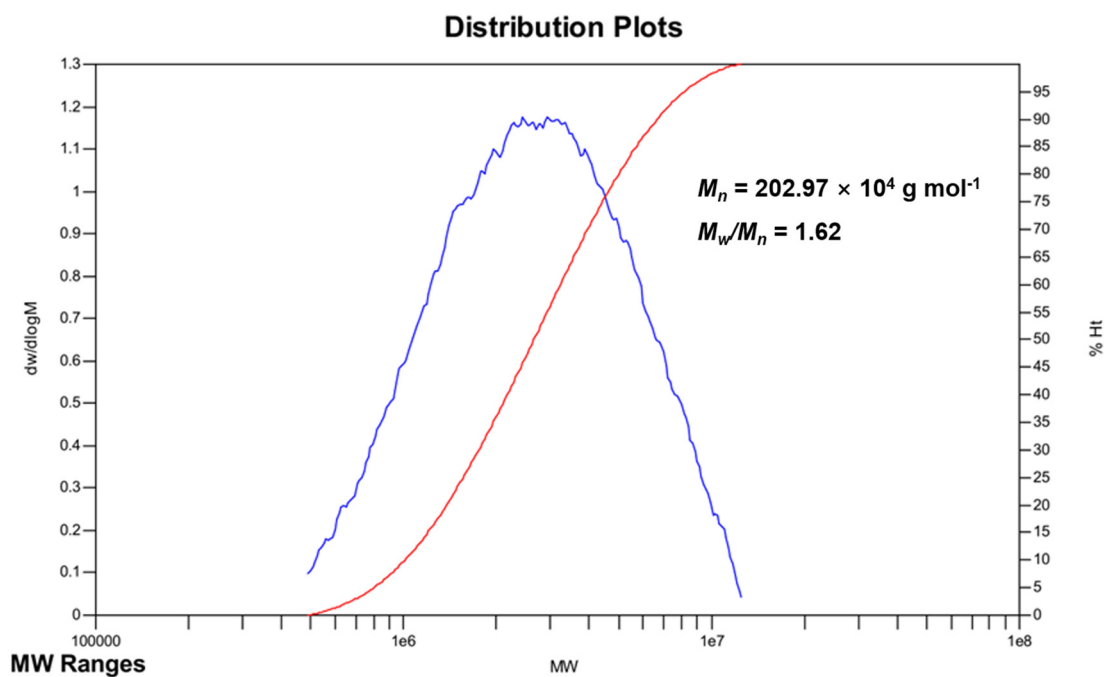

Figure S17. GPC curve of sPS sample obtained by complex 1-Sc

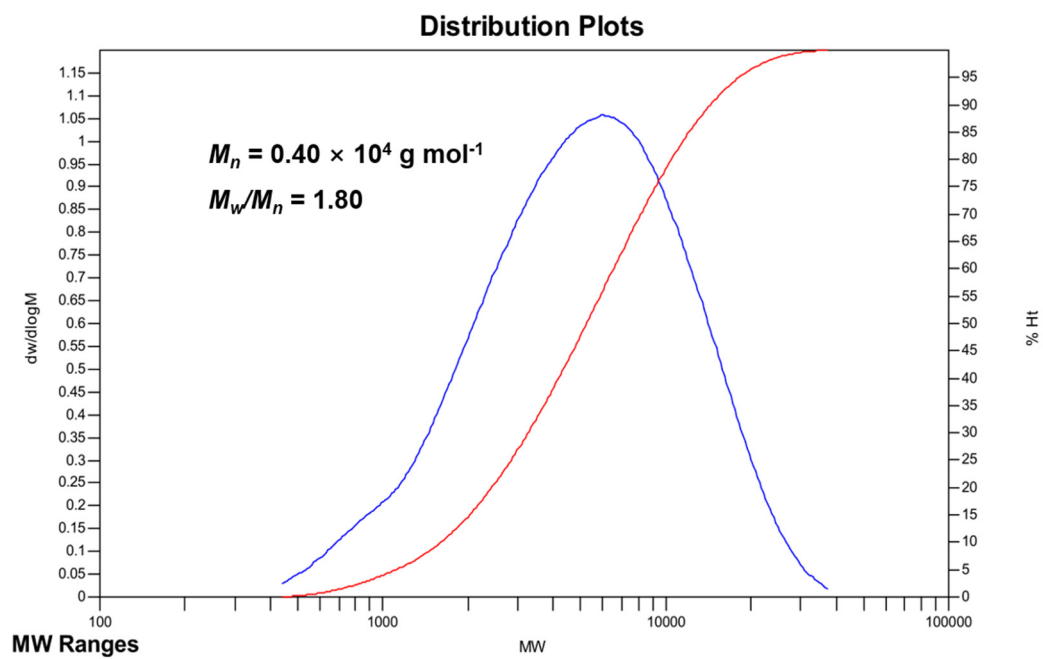

Figure S18. GPC curve of aPS (atactic polystyrene) sample obtained by complex 1-Ti

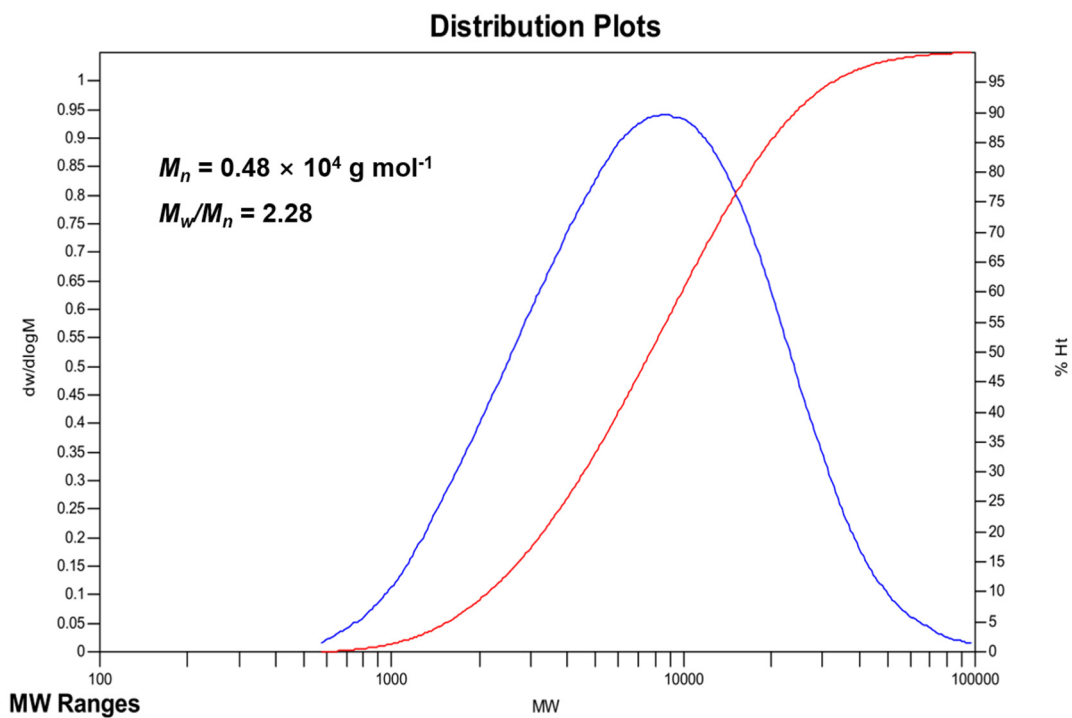

Figure S19. GPC curve of aPS (atactic polystyrene) sample obtained by complex **1-V**

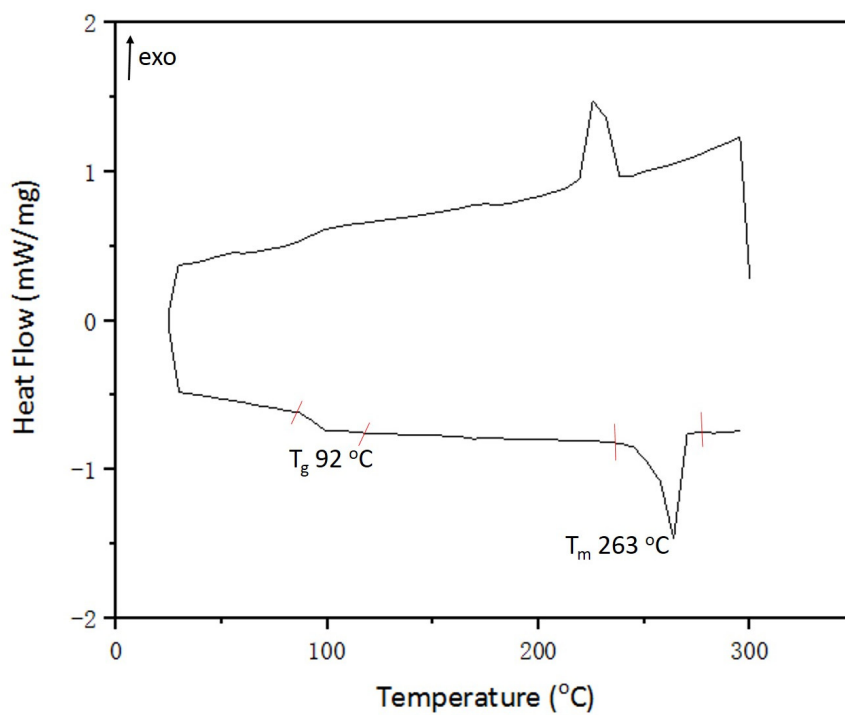

Figure S20. DSC curve of sPS obtained by complex **1-Sc**

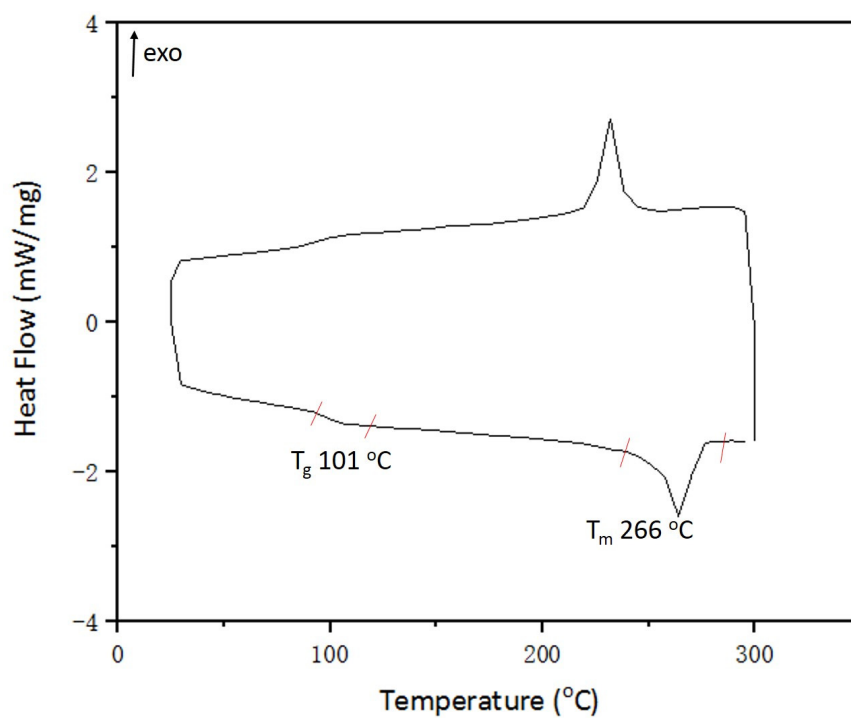

Figure S21. DSC curve of sPS obtained by complex 2-Sc

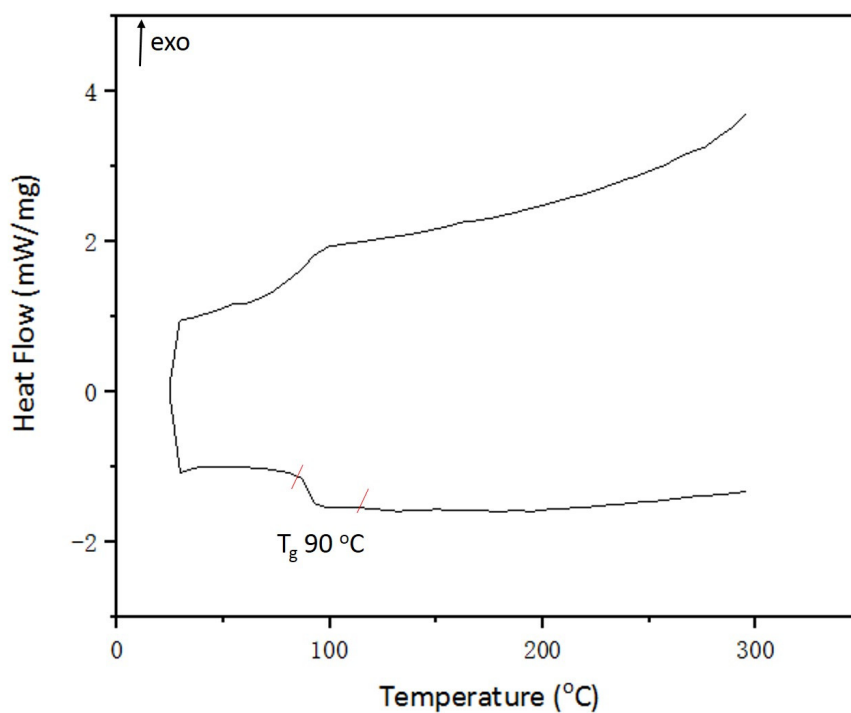

Figure S22. DSC curve of aPS (atactic polystyrene) obtained by complex 1-Ti

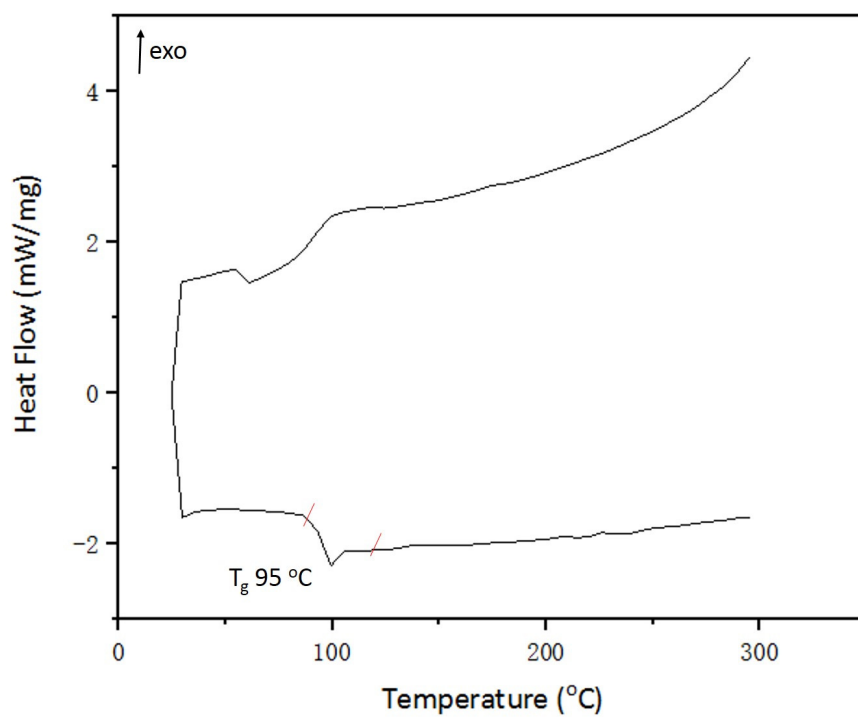

Figure S23. DSC curve of aPS (atactic polystyrene) obtained by complex 1-V

## X-ray Crystallographic Studies

Crystals for X-ray diffraction studies were obtained as described in the preparations. The crystals were manipulated in a glovebox under a microscope and were sealed in thin-walled glass capillaries. Intensity data were collected on a Rigaku Mercury CCD area detector with Mo or Cu  $K\alpha$  radiation. The diffracted intensities were corrected for Lorentz–polarization effects and empirical absorption corrections. All of the structures were solved using SHELXL-2018.<sup>1</sup> Structural refinement was performed using on  $F^2$  anisotropically for all of the non-hydrogen atoms by the full-matrix least-squares method. Structural refinement was performed using the SHELXL option in the WINGX system,<sup>2</sup> or Olex2 system<sup>3</sup> on  $F^2$  anisotropically for all of the non-hydrogen atoms by the full-matrix least-squares method. Analytical scattering factors for neutral atoms were used throughout the analysis. The hydrogen atoms of ligands were placed at the calculated positions, which were refined using a riding model. The analytical scattering factors for neutral atoms were used throughout the analysis. The residual electron densities were of no chemical significance.

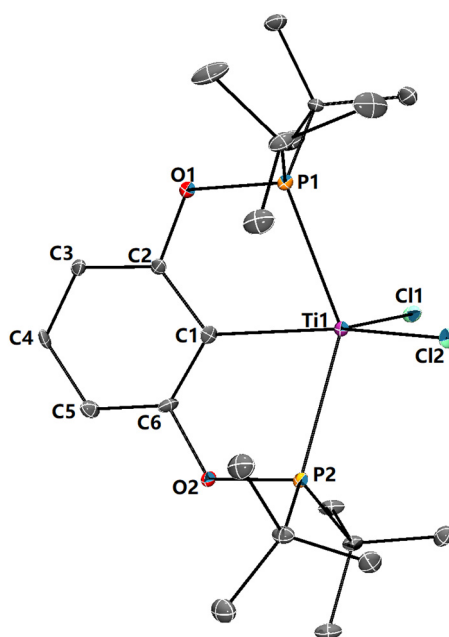

Figure S24. X-ray diffraction crystal structure of **3-Ti** with thermal ellipsoids drawn at 30% probability. Hydrogen atoms was omitted for clarity.

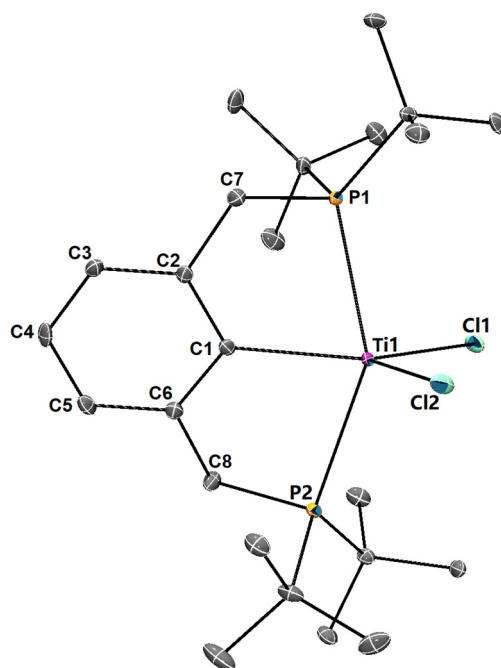

Figure S25. X-ray diffraction crystal structure of **4-Ti** with thermal ellipsoids drawn at 30% probability. Hydrogen atoms was omitted for clarity.

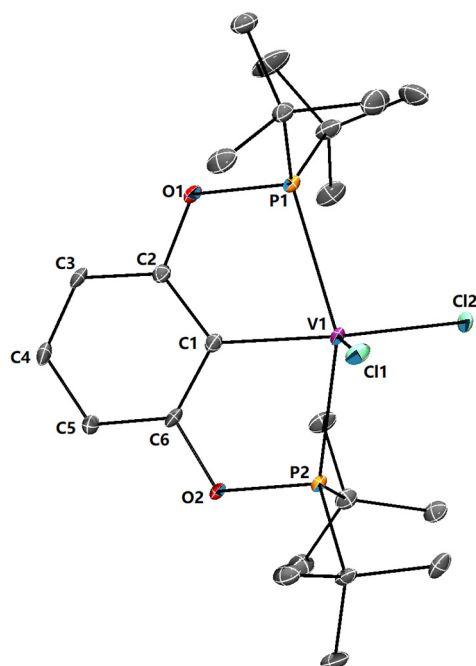

Figure S26. X-ray diffraction crystal structure of **3-V** with thermal ellipsoids drawn at 30% probability. Hydrogen atoms was omitted for clarity.

**Table S1. X-Ray crystallographic data and structure refinement for 1-Sc, 1-Ti, 1-V, 2-Sc and 2-Ti.**

|                                             | 1-Sc                                                                            | 2-Sc                                                             | 1-Ti                                                                            | 1-V                                                                            | 2-Ti                                                              |
|---------------------------------------------|---------------------------------------------------------------------------------|------------------------------------------------------------------|---------------------------------------------------------------------------------|--------------------------------------------------------------------------------|-------------------------------------------------------------------|
| CCDC                                        | 2161776                                                                         | 2163361                                                          | 2161777                                                                         | 2162723                                                                        | 2161786                                                           |
| formula                                     | C <sub>30</sub> H <sub>61</sub> O <sub>2</sub> P <sub>2</sub> ScSi <sub>2</sub> | C <sub>32</sub> H <sub>65</sub> P <sub>2</sub> ScSi <sub>2</sub> | C <sub>30</sub> H <sub>61</sub> O <sub>2</sub> P <sub>2</sub> TiSi <sub>2</sub> | C <sub>30</sub> H <sub>61</sub> O <sub>2</sub> P <sub>2</sub> VSi <sub>2</sub> | C <sub>32</sub> H <sub>65</sub> P <sub>2</sub> Si <sub>2</sub> Ti |
| crystal system                              | Orthorhombic                                                                    | Monoclinic                                                       | Orthorhombic                                                                    | Orthorhombic                                                                   | Orthorhombic                                                      |
| space group                                 | Pca21                                                                           | P21/c                                                            | Pca21                                                                           | Pca21                                                                          | Pca21                                                             |
| a, Å                                        | 16.3488(9)                                                                      | 16.7335(7)                                                       | 16.1891(2)                                                                      | 16.1044(4)                                                                     | 16.1352(2)                                                        |
| b, Å                                        | 13.2688(8)                                                                      | 13.2393(6)                                                       | 13.1418(2)                                                                      | 13.1750(3)                                                                     | 13.17667(18)                                                      |
| c, Å                                        | 16.9093(10)                                                                     | 16.9263(8)                                                       | 16.9923(3)                                                                      | 16.9968(6)                                                                     | 17.2700(3)                                                        |
| α, deg                                      | 90                                                                              | 90                                                               | 90                                                                              | 90                                                                             | 90                                                                |
| β, deg                                      | 90                                                                              | 97.212(4)                                                        | 90                                                                              | 90                                                                             | 90                                                                |
| γ, deg                                      | 90                                                                              | 90                                                               | 90                                                                              | 90                                                                             | 90                                                                |
| V, Å <sup>3</sup>                           | 3668.1(4)                                                                       | 3720.2(3)                                                        | 3615.18(10)                                                                     | 3606.30(18)                                                                    | 3671.75(9)                                                        |
| Z                                           | 4                                                                               | 4                                                                | 4                                                                               | 4                                                                              | 4                                                                 |
| D <sub>calcd</sub> , g/cm <sup>3</sup>      | 1.117                                                                           | 1.094                                                            | 1.139                                                                           | 1.147                                                                          | 1.099                                                             |
| temp, K                                     | 100                                                                             | 100                                                              | 100                                                                             | 100                                                                            | 100                                                               |
| μ, mm <sup>-1</sup> (MoKa)                  | 0.376                                                                           | 0.366                                                            | 3.645                                                                           | 0.453                                                                          | 3.542                                                             |
| reflections collected                       | 15172                                                                           | 19441                                                            | 13919                                                                           | 42226                                                                          | 9078                                                              |
| independent reflections (R <sub>int</sub> ) | 7508(0.0305)                                                                    | 8822(0.0410)                                                     | 5894(0.0323)                                                                    | 8658(0.0590)                                                                   | 6009(0.0370)                                                      |
| R1 (I > 2σ(I))                              | 0.0430                                                                          | 0.0394                                                           | 0.0260                                                                          | 0.0384                                                                         | 0.0460                                                            |
| wR2 (I > 2σ(I))                             | 0.0946                                                                          | 0.0936                                                           | 0.0677                                                                          | 0.0866                                                                         | 0.1249                                                            |
| wR2 (all data)                              | 0.1014                                                                          | 0.1014                                                           | 0.0681                                                                          | 0.0929                                                                         | 0.1257                                                            |
| parameters                                  | 353                                                                             | 335                                                              | 335                                                                             | 353                                                                            | 352                                                               |
| GOF                                         | 1.023                                                                           | 1.027                                                            | 1.041                                                                           | 0.981                                                                          | 1.067                                                             |
| absolute structure Flack                    | 0.28(4)                                                                         | -                                                                | 0.004(4)                                                                        | -0.06(2)                                                                       | 0.000(8)                                                          |



**Table S2. X-Ray crystallographic data and structure refinement for 3-Ti, 3-V and 4-Ti.**

|                                                | <b>3-Ti</b>                                                                      | <b>3-V</b>                                                                      | <b>4-Ti</b>                                                       |
|------------------------------------------------|----------------------------------------------------------------------------------|---------------------------------------------------------------------------------|-------------------------------------------------------------------|
| CCDC                                           | 2168774                                                                          | 2168775                                                                         | 2169339                                                           |
| formula                                        | C <sub>22</sub> H <sub>39</sub> Cl <sub>2</sub> O <sub>2</sub> P <sub>2</sub> Ti | C <sub>22</sub> H <sub>39</sub> Cl <sub>2</sub> O <sub>2</sub> P <sub>2</sub> V | C <sub>24</sub> H <sub>43</sub> Cl <sub>2</sub> P <sub>2</sub> Ti |
| crystal system                                 | Monoclinic                                                                       | Monoclinic                                                                      | Monoclinic                                                        |
| space group                                    | P21/n                                                                            | P21/n                                                                           | P21/n                                                             |
| a, Å                                           | 10.6740(6)                                                                       | 10.6403(4)                                                                      | 12.1470(7)                                                        |
| b, Å                                           | 16.1874(9)                                                                       | 16.2799(8)                                                                      | 15.8810(7)                                                        |
| c, Å                                           | 15.2797(10)                                                                      | 15.1343(8)                                                                      | 14.4631(11)                                                       |
| α, deg                                         | 90                                                                               | 90                                                                              | 90                                                                |
| β, deg                                         | 91.080(6)                                                                        | 90.332(4)                                                                       | 105.389(7)                                                        |
| γ, deg                                         | 90                                                                               | 90                                                                              | 90                                                                |
| V, Å <sup>3</sup>                              | 2639.6(3)                                                                        | 2621.6(2)                                                                       | 2690.0(3)                                                         |
| Z                                              | 4                                                                                | 4                                                                               | 4                                                                 |
| D <sub>calcd</sub> , g/cm <sup>3</sup>         | 1.299                                                                            | 1.316                                                                           | 1.265                                                             |
| temp, K                                        | 100                                                                              | 100                                                                             | 100                                                               |
| μ, mm <sup>-1</sup> (MoKa)                     | 0.663                                                                            | 0.720                                                                           | 0.645                                                             |
| reflections collected                          | 14374                                                                            | 31769                                                                           | 18427                                                             |
| independent reflections<br>(R <sub>int</sub> ) | 6321(0.0919)                                                                     | 6664(0.0750)                                                                    | 6450(0.1071)                                                      |
| R1 ( <i>I</i> > 2σ( <i>I</i> ))                | 0.0725                                                                           | 0.0525                                                                          | 0.0565                                                            |
| wR2 ( <i>I</i> > 2σ( <i>I</i> ))               | 0.1300                                                                           | 0.1235                                                                          | 0.1369                                                            |
| wR2 (all data)                                 | 0.1688                                                                           | 0.1368                                                                          | 0.1703                                                            |
| parameters                                     | 274                                                                              | 274                                                                             | 274                                                               |
| GOF                                            | 1.048                                                                            | 1.029                                                                           | 1.045                                                             |

## References

1. G. M. Sheldrick, *Acta Cryst.* **2015**, *C71*, 3–8.
2. L. J. J. Farrugia, WinGX suite for small-molecule single-crystal crystallography. *J. Appl. Cryst.* **1999**, *32*(4), 837–838.
3. O. V. Dolomanov, L. J. Bourhis, R. J. Gildea, J. A. K. Howard, H. Puschmann, *J. Appl. Cryst.* **2009**, *42*, 339-341.
